# Supplementary material
Source: Springer Nature journal article supplement (https://www.springermedizin.de/resource/supplementary/12955_2008_628_MOESM2_ESM.pdf/9561060)
Supplement: MOESM2 [file 9561060]

Children invited via FPs (n=207) and hospital paediatric outpatient department (n=24)  
-diagnosed with asthma;  
-between 6-12 years old;  
-no serious morbidity other than asthma

Enrollment

Total excluded (203)  
Ineligible (n= 195)  
-not meeting inclusion criteria (i.e., parents reported no respiratory medication or no symptoms in previous year) (n= 8)  
-declined invitation to participate (n= 70)  
-no response (n= 117)  
Excluded since sufficient number of children of same age/disease severity included (n= 8)

Drop out before focus group meetings (n =3)

Group 1 (pilot)  
-5 children  
-Age (7-11)  
-1 girl  
-Severity (intermit – moderate)

Group 2  
-5 children  
-Age (6-9)  
-2 girls  
-Severity (intermit. – moderate)

Group 3  
-6 children  
-Age (6-10)  
-1 girl  
-Severity (intermit - moderate)

Group 4  
-4 children  
-Age (7-11)  
-4 girls  
-Severity (mild - severe)

Group 5  
-5 children  
-Age (8-11)  
-2 girls  
-Severity (moderate - severe)
